# Supplementary material
Source: PubMed Central journal article supplement (PMC4300301)
Supplement: DS_10.1177_0022034514559376.pdf [file DS_10.1177_0022034514559376.pdf]

# Cantharidins Induce ER Stress and a Terminal Unfolded Protein Response in OSCC

Y. Xi<sup>1,2,\*</sup>, D.M. Garshott<sup>2,\*</sup>, A.L. Brownell<sup>2</sup>, G.H. Yoo<sup>3</sup>, H.-S. Lin<sup>3</sup>, T.L. Freeburg<sup>3</sup>, N.G. Yoo<sup>3</sup>, R.J. Kaufman<sup>4</sup>, M.U. Callaghan<sup>2</sup>, and A.M. Fribley<sup>2,3,5</sup>

## Appendix

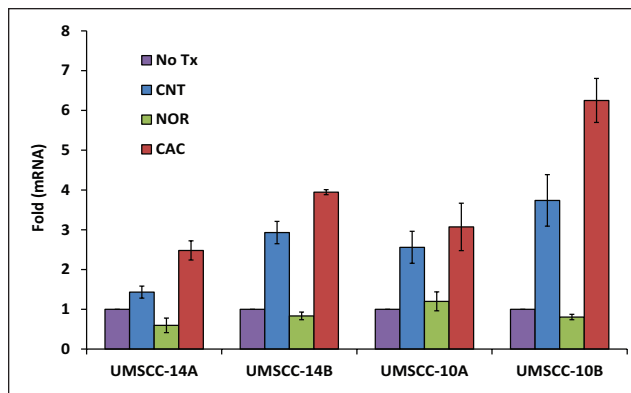

**Appendix Figure 1.** Quantitative reverse transcription polymerase chain reaction (RT-qPCR) analysis of CHOP messenger RNA transcripts in a panel of oral squamous cell carcinoma (OSCC) cell lines treated with 10  $\mu$ M cantharidin, norcantharidin, and cantharidic acid for 6 h. For RT-qPCR, 18S ribosomal RNA was used as internal control, and error bars represent standard deviation of technical replicates.

<sup>1</sup>The Key Laboratory of Pathobiology, Ministry of Education, Norman Bethune College of Medicine, Jilin University, Changchun, China

<sup>2</sup>Carmen and Ann Adams Department of Pediatrics, Division of Hematology Oncology, Children's Hospital of Michigan, Detroit, MI, USA

<sup>3</sup>Department of Otolaryngology, Wayne State University and Karmanos Cancer Institute, Detroit, MI, USA

<sup>4</sup>Degenerative Diseases Program, Sanford|Burnham Medical Research Institute, La Jolla, CA and Department of Pharmacology, University of California Medical Center, La Jolla, CA, USA

<sup>5</sup>Developmental Therapeutics Program, Barbara Ann Karmanos Cancer Institute, Detroit, MI, USA

\*Authors contributing equally to this article.

### Corresponding Authors:

R.J. Kaufman, Degenerative Diseases Program, Sanford|Burnham Medical Research Institute, La Jolla, CA 92037 and Department of Pharmacology, University of California Medical Center, 10901 North Torrey Pines Road, rm 7103, La Jolla, CA 92037, USA.

Email: rkaufman@sanfordburnham.org

A.M. Fribley, Wayne State University School of Medicine 421 E. Canfield, rm 2228 Detroit, MI 48201, USA.

Email: afribley@med.wayne.edu

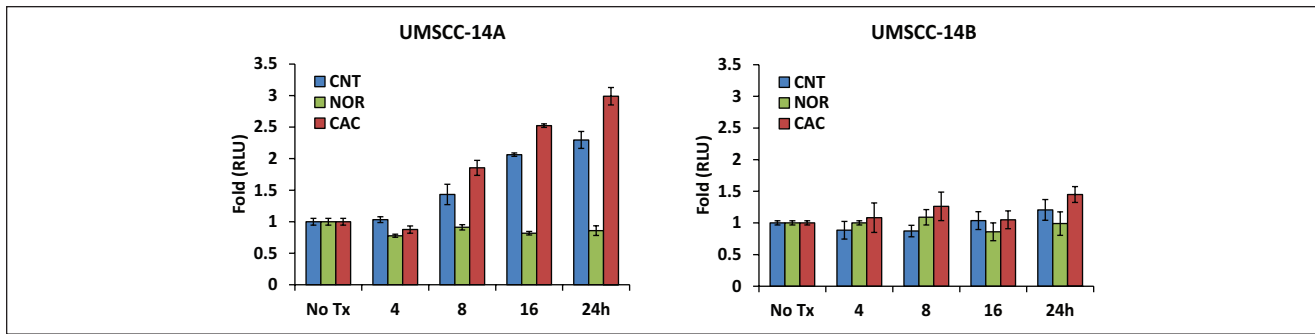

**Appendix Figure 2.** Luminescent caspase 3/7 enzymatic assay in 2 oral squamous cell carcinoma (OSCC) cell lines treated with 10  $\mu$ M cantharidin, norcantharidin, and cantharidic acid for 4, 8, 16, and 24 h. Error bars represent standard deviation of technical replicates.

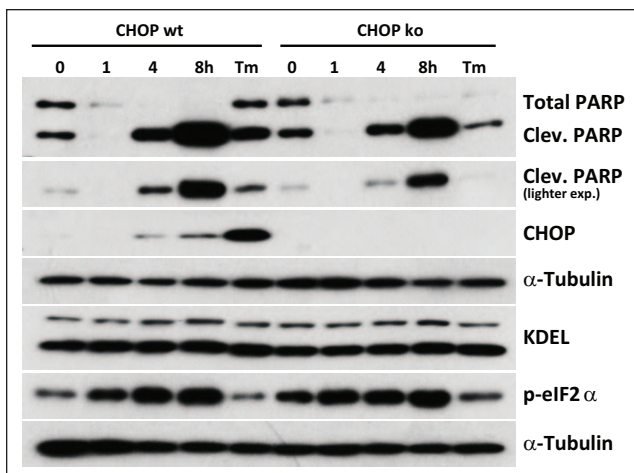

**Appendix Figure 3.** Immunoblot analysis of whole-cell lysates from *Chop* wt and knockout MEF with polyclonal antibodies for PARP, CHOP, KDEL (GRP78 and GRP94), and phospho-eIF2 $\alpha$ .

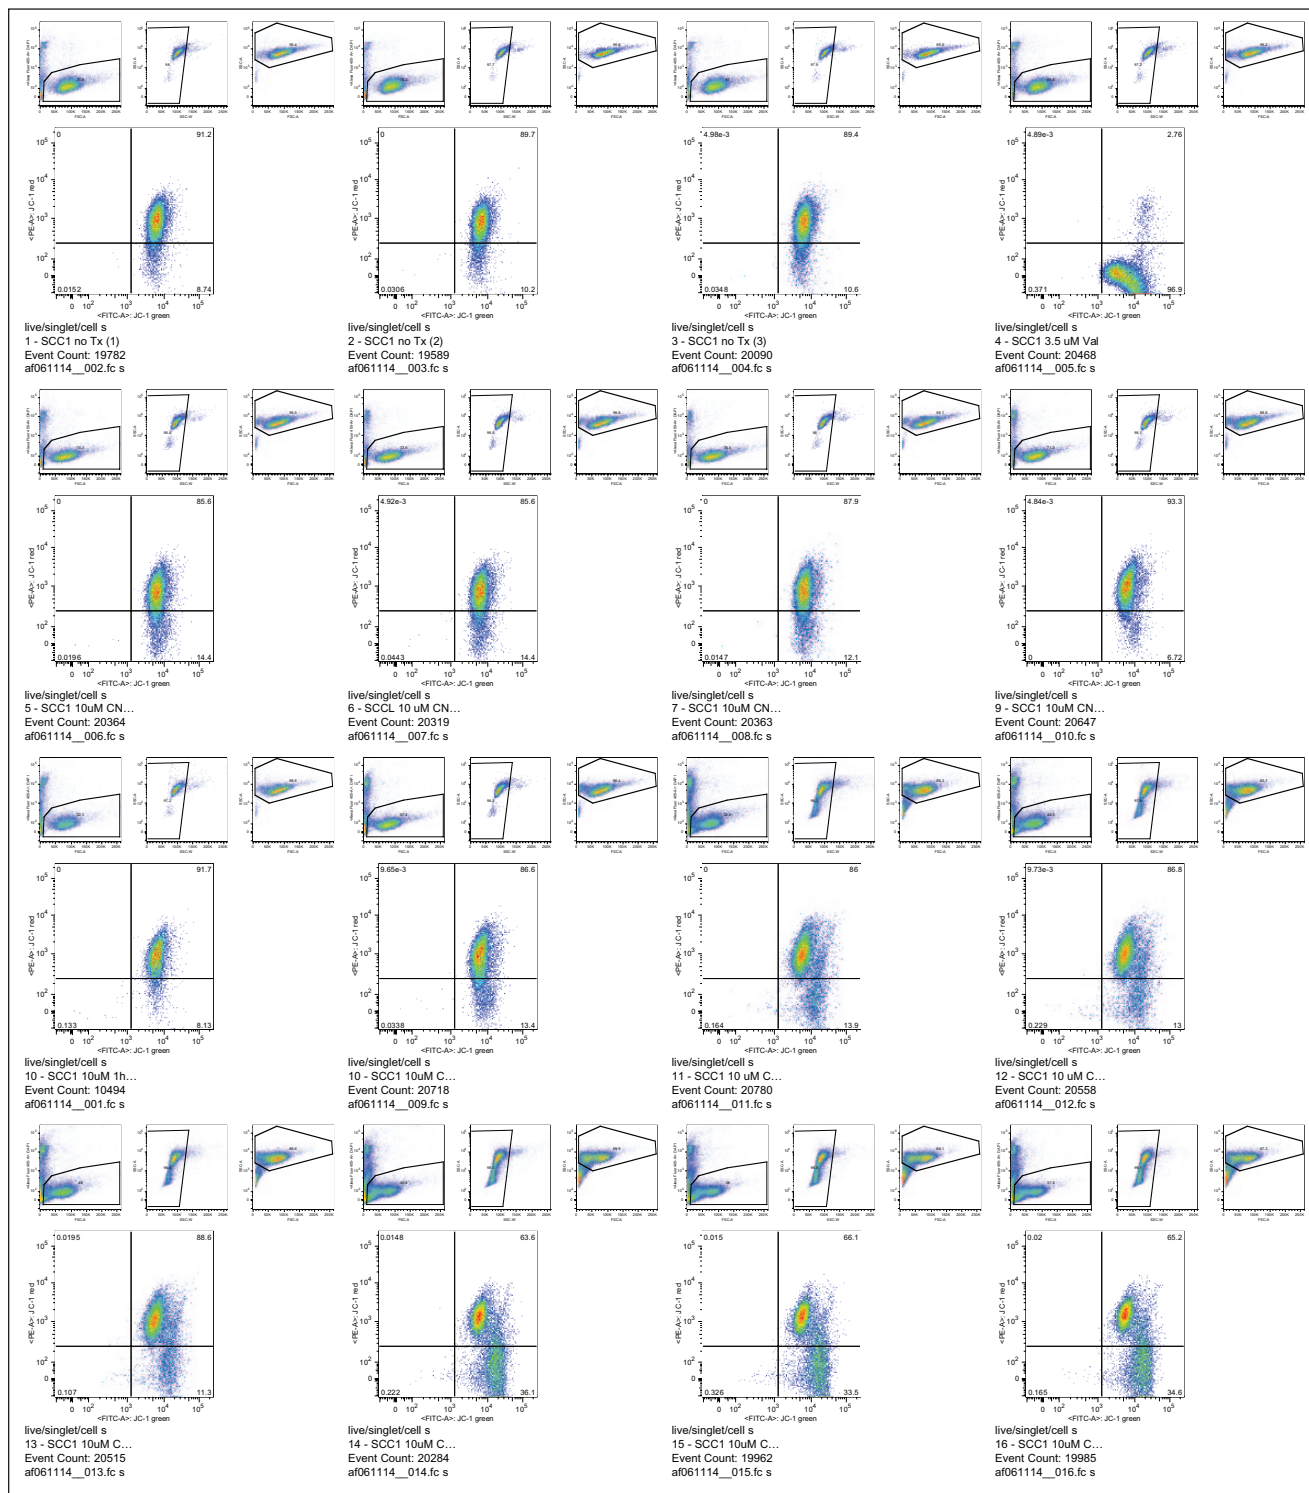

Appendix Figure 4. Fluorescence-activated cell sorting data used to generate the graph in Figure 3C.

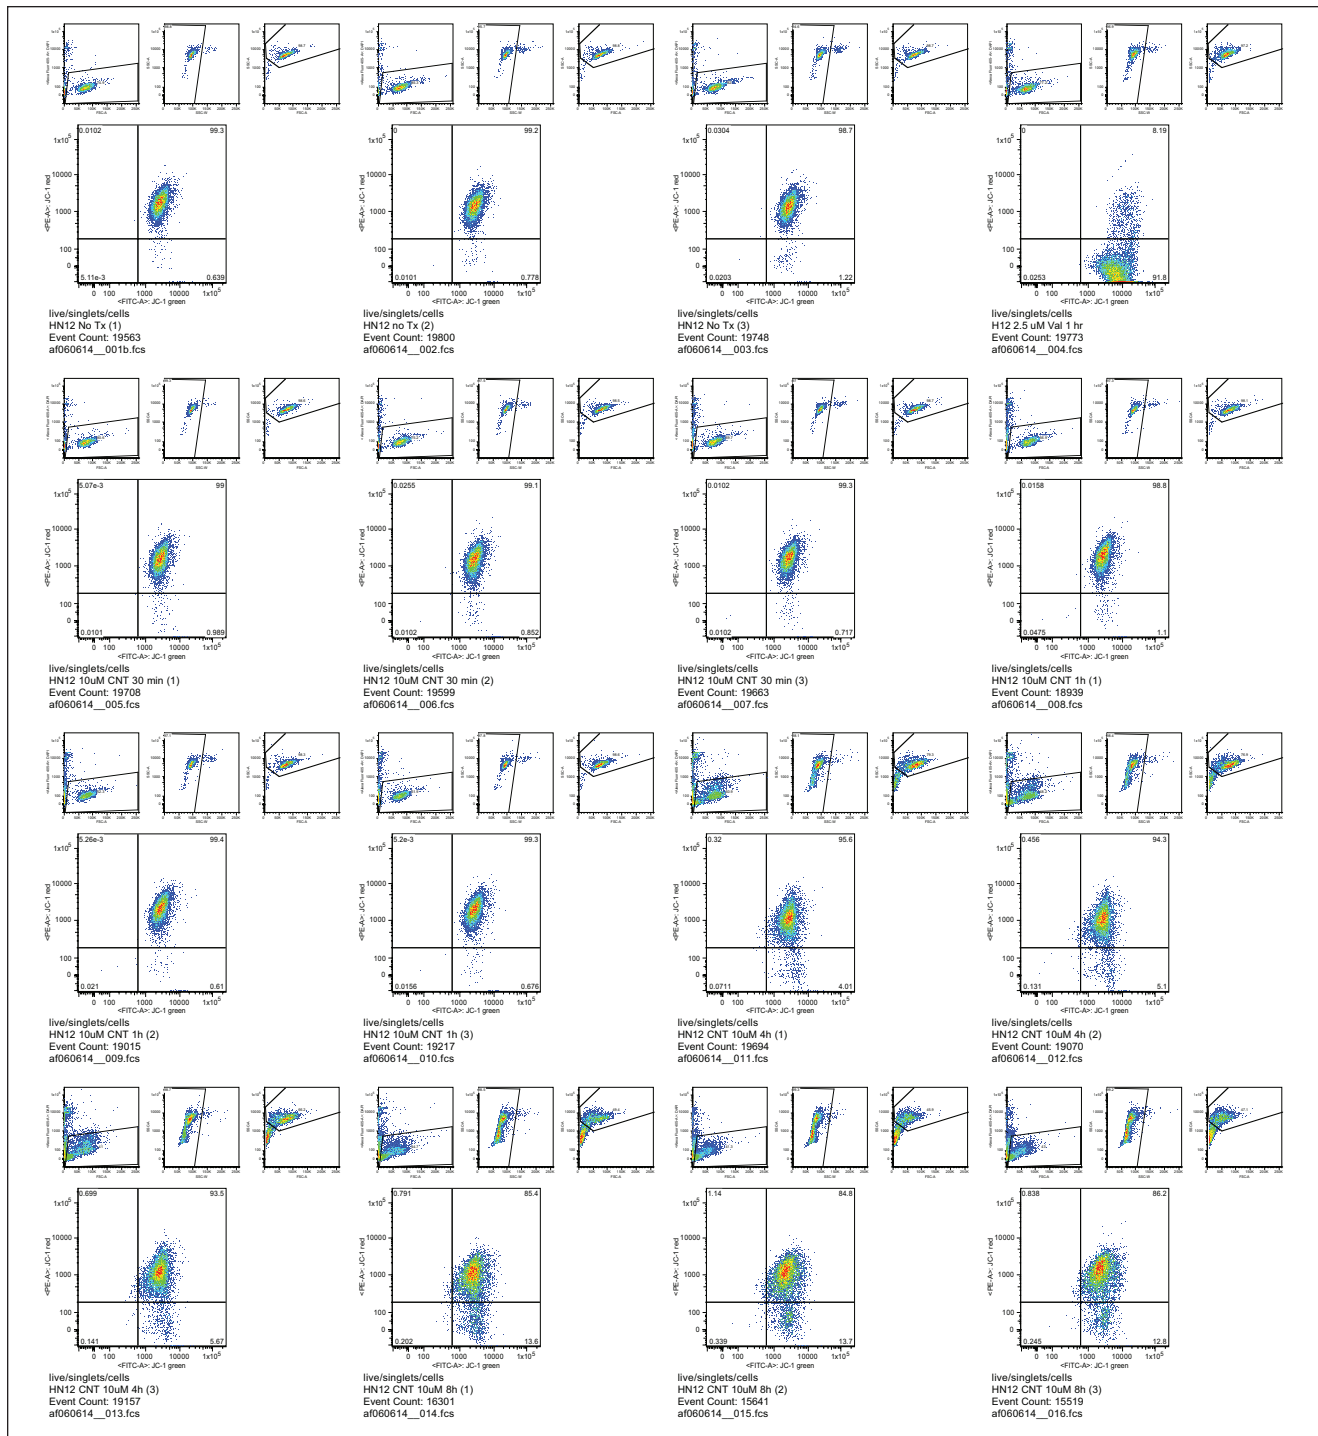

Appendix Figure 5. Fluorescence-activated cell sorting data used to generate the graph in Figure 3C.

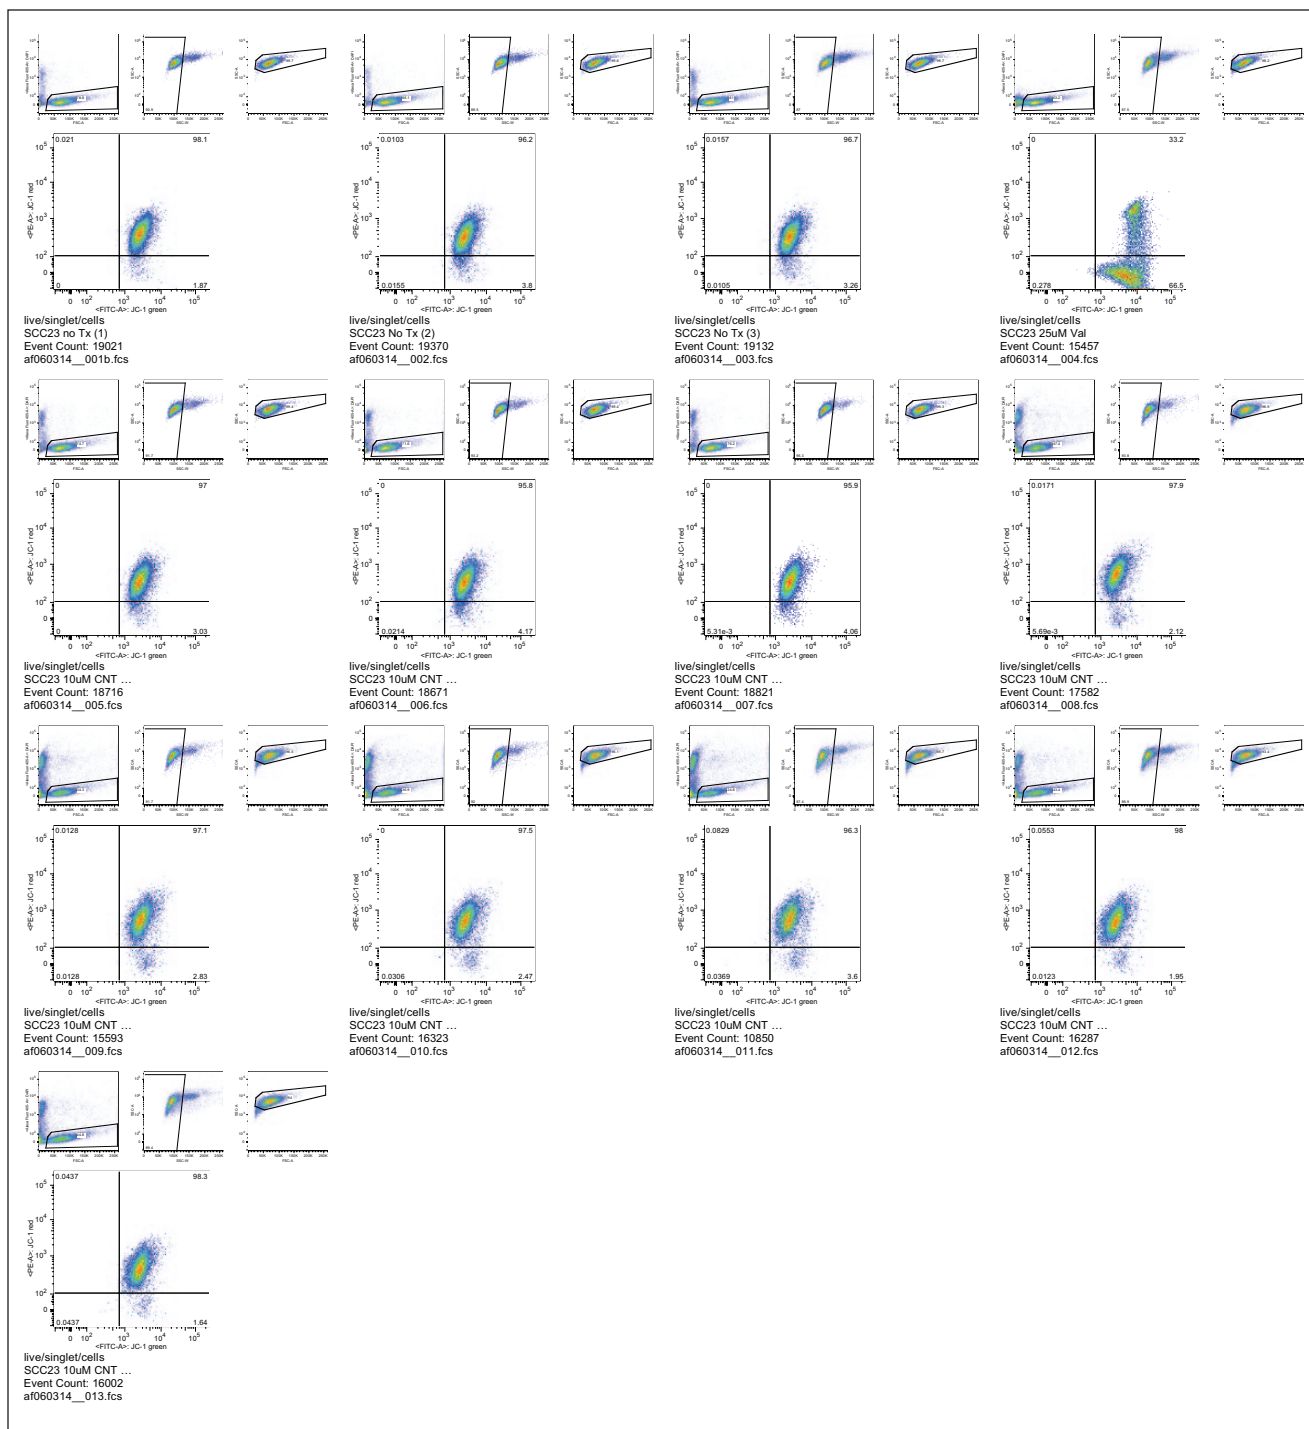

Appendix Figure 6. Fluorescence-activated cell sorting data used to generate the graph in Figure 3C.

**Appendix Table.** RT2 Profiler Polymerase Chain Reaction Array Analysis of 86 Human Apoptotic Messenger RNA Transcripts, Performed and Analyzed According to the Manufacturer's Protocol, in UMSCC-I Cells Treated with 10  $\mu$ M Cantharidin for 4, 8, and 12 h.

| Human Gene                                                                        | Symbol  | Fold Change     |               |                 |
|-----------------------------------------------------------------------------------|---------|-----------------|---------------|-----------------|
|                                                                                   |         | 4               | 8             | 12h             |
| C-abl oncogene 1, non-receptor tyrosine kinase                                    | ABL1    | 1.0281          | -1.09433      | -1.71703        |
| V-akt murine thymoma viral oncogene homolog 1                                     | AKT1    | 1.057           | 1.0867        | -1.77778        |
| Apoptotic peptidase activating factor 1                                           | APAF1   | <b>-3.45781</b> | <b>2.2038</b> | -1.07181        |
| BCL2-associated agonist of cell death                                             | BAD     | 1.3104          | -1.19746      | <b>-2.49688</b> |
| BCL2-associated athanogene                                                        | BAG1    | 1.0281          | 1.3104        | 1.4241          |
| BCL2-associated athanogene 3                                                      | BAG3    | -1.07921        | -1.1892       | -1.74125        |
| BCL2-associated athanogene 4                                                      | BAG4    | <b>-7.57002</b> | -1.55836      | <b>-2.04207</b> |
| BCL2-antagonist/killer 1                                                          | BAK1    | 1.2311          | -1.54751      | -1.89215        |
| BCL2-associated X protein                                                         | BAX     | -1.07921        | -1.44383      | -1.94515        |
| B-cell CLL/lymphoma 10                                                            | BCL10   | <b>-3.70645</b> | 1.366         | 1.7901          |
| B-cell CLL/lymphoma 2                                                             | BCL2    | -1.08672        | 1.3851        | 1.1647          |
| BCL2-related protein A1                                                           | BCL2A1  | -1.6818         | -1.17288      | 1.0867          |
| BCL2-like 1                                                                       | BCL2L1  | -1.14863        | -1.14077      | -1.80245        |
| BCL2-like 10 (apoptosis facilitator)                                              | BCL2L10 | -1.23977        | <b>2.3457</b> | <b>3.8106</b>   |
| BCL2-like 11 (apoptosis facilitator)                                              | BCL2L11 | -1.3947         | 1.815         | 1.7901          |
| BCL2-like 2                                                                       | BCL2L2  | -1.10193        | 1.366         | -1.4241         |
| BCL2-associated transcription factor 1                                            | BCLAF1  | <b>-41.6667</b> | -1.20584      | -1.65865        |
| Bifunctional apoptosis regulator                                                  | BFAR    | -1.6818         | -1.40449      | -1.82782        |
| BH3 interacting domain death agonist                                              | BID     | 1.0792          | -1.12511      | -1.69348        |
| BCL2-interacting killer (apoptosis-inducing)                                      | BIK     | 1.1892          | 1.9319        | <b>2.6208</b>   |
| NLR family, apoptosis inhibitory protein                                          | NAIP    | <b>-4.85673</b> | <b>2.2346</b> | 1.1567          |
| Baculoviral IAP repeat containing 2                                               | BIRC2   | <b>-16</b>      | 1.3472        | -1.19746        |
| Baculoviral IAP repeat containing 3                                               | BIRC3   | <b>-50.2513</b> | 1.1975        | -1.90512        |
| X-linked inhibitor of apoptosis                                                   | XIAP    | <b>-6.02047</b> | 1.9453        | -1.14077        |
| Baculoviral IAP repeat containing 6                                               | BIRC6   | <b>-12.6422</b> | -1.16469      | 1.2311          |
| Baculoviral IAP repeat containing 8                                               | BIRC8   | -1.18106        | 1.1567        | 2.1435          |
| BCL2/adenovirus E1B 19kDa interacting protein 1                                   | BNIP1   | 1.0718          | -1.29232      | <b>-3.2041</b>  |
| BCL2/adenovirus E1B 19kDa interacting protein 2                                   | BNIP2   | <b>-9.38086</b> | 1.3851        | -1.12511        |
| BCL2/adenovirus E1B 19kDa interacting protein 3                                   | BNIP3   | -1.38504        | 1.1329        | 1.0943          |
| BCL2/adenovirus E1B 19kDa interacting protein 3-like                              | BNIP3L  | <b>-2.92826</b> | 1.7654        | 1.9185          |
| V-raf murine sarcoma viral oncogene homolog B1                                    | BRAF    | <b>-2.84819</b> | 1.7053        | 1.1408          |
| Nucleotide-binding oligomerization domain containing 1                            | NOD1    | -1.46413        | <b>2.9079</b> | 1.3287          |
| Caspase recruitment domain family, member 6                                       | CARD6   | <b>-2.12857</b> | 1.5801        | 1.4241          |
| Caspase recruitment domain family, member 8                                       | CARD8   | <b>-7.1582</b>  | 1.5801        | -1.00695        |
| Caspase 1, apoptosis-related cysteine peptidase (interleukin 1, beta, convertase) | CASP1   | <b>-7.36377</b> | <b>-2</b>     | -1.37552        |
| Caspase 10, apoptosis-related cysteine peptidase                                  | CASP10  | <b>-3.50631</b> | -1.04243      | <b>-3.41064</b> |
| Caspase 14, apoptosis-related cysteine peptidase                                  | CASP14  | -1.18106        | 1.1567        | <b>2.1435</b>   |
| Caspase 2, apoptosis-related cysteine peptidase                                   | CASP2   | -1.31044        | -1.4339       | <b>-3.13873</b> |

(continued)

**Appendix Table.** (continued)

| Human Gene                                                    | Symbol    | Fold Change     |                 |                 |
|---------------------------------------------------------------|-----------|-----------------|-----------------|-----------------|
|                                                               |           | 4               | 8               | 12h             |
| Caspase 3, apoptosis-related cysteine peptidase               | CASP3     | <b>-8.87311</b> | 1.0943          | -1.20584        |
| Caspase 4, apoptosis-related cysteine peptidase               | CASP4     | <b>-2.25023</b> | -1.25707        | -1.18106        |
| Caspase 5, apoptosis-related cysteine peptidase               | CASP5     | -1.18106        | 1.1567          | <b>2.1435</b>   |
| Caspase 6, apoptosis-related cysteine peptidase               | CASP6     | -1.17288        | -1.02103        | -1.3947         |
| Caspase 7, apoptosis-related cysteine peptidase               | CASP7     | -1.47427        | 1.4845          | <b>-2.05634</b> |
| Caspase 8, apoptosis-related cysteine peptidase               | CASP8     | <b>-2.09952</b> | -1.14863        | <b>-2.11416</b> |
| Caspase 9, apoptosis-related cysteine peptidase               | CASP9     | 1.1173          | 1.7291          | <b>2.042</b>    |
| CD40 molecule, TNF receptor superfamily member 5              | CD40      | -1.14077        | -1.02103        | 1.1096          |
| CD40 ligand                                                   | CD40LG    | -1.18106        | 1.1567          | <b>2.1435</b>   |
| CASP8 and FADD-like apoptosis regulator                       | CFLAR     | <b>-2.05634</b> | -1.33797        | <b>-2.56674</b> |
| Cell death-inducing DFFA-like effector a                      | CIDEA     | 1.2924          | 1.3566          | <b>2.1435</b>   |
| Cell death-inducing DFFA-like effector b                      | CIDEB     | -1.01399        | -1.37552        | <b>-5.8548</b>  |
| CASP2 and RIPK1 domain containing adaptor with death domain   | CRADD     | -1.3947         | -1.51561        | 1.014           |
| Death-associated protein kinase I                             | DAPK1     | -1.18106        | 1.8921          | <b>7.0128</b>   |
| DNA fragmentation factor, 45kDa, alpha polypeptide            | DFFA      | -1.32873        | -1.38504        | <b>-2.53165</b> |
| Fas (TNFRSF6)-associated via death domain                     | FADD      | -1.02807        | -1.14863        | <b>-2.62055</b> |
| Fas (TNF receptor superfamily, member 6)                      | FAS       | <b>-20.6612</b> | -1.3947         | <b>-2.32937</b> |
| Fas ligand (TNF superfamily, member 6)                        | FASLG     | -1.18106        | 1.1567          | <b>2.1435</b>   |
| Harakiri, BCL2 interacting protein (contains only BH3 domain) | HRK       | 1.1329          | <b>2.0279</b>   | <b>2.0139</b>   |
| Insulin-like growth factor I receptor                         | IGFIR     | -1.91865        | 1.1173          | 1.1408          |
| Lymphotoxin alpha (TNF superfamily, member 1)                 | LTA       | 1.454           | <b>4.0278</b>   | <b>5.1337</b>   |
| Lymphotoxin beta receptor (TNFR superfamily, member 3)        | LTBR      | -1.51561        | -1.97239        | <b>-2.49688</b> |
| Myeloid cell leukemia sequence 1 (BCL2-related)               | MCL1      | <b>-3.07409</b> | 1.021           | 1.4241          |
| Nucleolar protein 3 (apoptosis repressor with CARD domain)    | NOL3      | -1.53681        | -1.20584        | 1.3104          |
| PYD and CARD domain containing                                | PYCARD    | 1.1975          | -1.46413        | -1.61316        |
| Receptor-interacting serine-threonine kinase 2                | RIPK2     | <b>-4.14079</b> | 1.5801          | -1.09433        |
| Tumor necrosis factor                                         | TNF       | 1.5476          | <b>3.0525</b>   | 1.7171          |
| Tumor necrosis factor receptor superfamily, member 10a        | TNFRSF10A | 1.1975          | 1.6358          | <b>-2.88767</b> |
| Tumor necrosis factor receptor superfamily, member 10b        | TNFRSF10B | 1.4142          | 1.7411          | -1.94515        |
| Tumor necrosis factor receptor superfamily, member 11b        | TNFRSF11B | <b>-4.14079</b> | -1              | -1.63586        |
| Tumor necrosis factor receptor superfamily, member 1A         | TNFRSF1A  | -1.4241         | -1.60205        | -1.82782        |
| Tumor necrosis factor receptor superfamily, member 21         | TNFRSF21  | <b>-2.29727</b> | <b>-2.25023</b> | <b>-5.54017</b> |
| Tumor necrosis factor receptor superfamily, member 25         | TNFRSF25  | 1.2311          | <b>5.3889</b>   | 1.0353          |
| CD27 molecule                                                 | CD27      | -1.10951        | <b>3.4581</b>   | 1.9053          |
| Tumor necrosis factor receptor superfamily, member 9          | TNFRSF9   | 1.9453          | <b>9.8492</b>   | <b>7.0128</b>   |
| Tumor necrosis factor (ligand) superfamily, member 10         | TNFSF10   | <b>-12.5471</b> | 1.1408          | 1.3379          |
| CD70 molecule                                                 | CD70      | 1.3013          | 1.3013          | -1.11732        |
| Tumor necrosis factor (ligand) superfamily, member 8          | TNFSF8    | -1.18106        | <b>5.2054</b>   | <b>2.1435</b>   |
| Tumor protein p53                                             | TP53      | -1.80245        | 1.007           | <b>-2.75103</b> |

(continued)

**Appendix Table.** (continued)

| Human Gene                               | Symbol  | Fold Change     |          |                 |
|------------------------------------------|---------|-----------------|----------|-----------------|
|                                          |         | 4               | 8        | 12h             |
| Tumor protein p53 binding protein, 2     | TP53BP2 | <b>-4.0833</b>  | 1.5157   | -1.21418        |
| Tumor protein p73                        | TP73    | -1.18106        | 1.1567   | <b>2.1435</b>   |
| TNFRSF1A-associated via death domain     | TRADD   | -1.0353         | -1.46413 | -1.75316        |
| TNF receptor-associated factor 2         | TRAF2   | 1.3013          | 1.007    | <b>-2.75103</b> |
| TNF receptor-associated factor 3         | TRAF3   | 1.1173          | 1.2483   | -1.56912        |
| TNF receptor-associated factor 4         | TRAF4   | 1.3104          | 1.1019   | <b>-434.783</b> |
| Beta-2-microglobulin                     | B2M     | <b>-2.11416</b> | -1.04976 | -1.36612        |
| Hypoxanthine phosphoribosyltransferase I | HPRT1   | <b>-4.31779</b> | -1.49477 | -1.3947         |
| Ribosomal protein L13a                   | RPL13A  | -1              | -1       | -1              |
| Glyceraldehyde-3-phosphate dehydrogenase | GAPDH   | 1.0644          | -1.17288 | -1.13289        |
| Actin, beta                              | ACTB    | 1.1647          | -1.26582 | -1.89215        |
| Human Genomic DNA Contamination          | HGDC    | -1.18106        | 1.1567   | <b>2.1435</b>   |

Blue values represent genes increased  $\geq 2$  fold, and red values represent genes decreased  $\geq$  to normalized controls, as described in the manufacturers' protocol.
